# Supplementary material
Source: ML conference proceedings conference paper supplement (https://proceedings.mlr.press/v97/shestopaloff19a.html)
Supplement: Supplementary file [file shestopaloff19a-supp.pdf]

---

# Supplementary Material for Replica Conditional Sequential Monte Carlo

---

Alexander Y. Shestopaloff<sup>1,2</sup> Arnaud Doucet<sup>3,2</sup>

## 1. Validity of Replica cSMC

It is easy to see that the proposed update leaves  $\bar{\pi}$  invariant. Let  $M_{x_{1:T}}^{(-k)}(x_{1:T}^{(k)'}|x_{1:T}^{(k)})$  be the cSMC transition kernel used to update replica  $x_{1:T}^{(k)}$ ,  $k = 1, \dots, K$ , where  $x_{1:T}^{(-k)} := (x_{1:T}^{(1)'}, \dots, x_{1:T}^{(k-1)'}, x_{1:T}^{(k+1)}, \dots, x_{1:T}^{(K)})$ . The replica update is a composition of the  $M_{x_{1:T}}^{(-k)}$  so we can write the replica cSMC transition kernel  $M$  as a product,  $M(x_{1:T}^{(1:K)'}|x_{1:T}^{(1:K)}) = \prod_{k=1}^K M_{x_{1:T}}^{(-k)}(x_{1:T}^{(k)'}|x_{1:T}^{(k)})$ .

The replica cSMC transition kernel  $M$  then leaves  $\bar{\pi}$  invariant since we have

$$\begin{aligned}
 & \int \bar{\pi}(x_{1:T}^{(1:K)}) M(x_{1:T}^{(1:K)'}|x_{1:T}^{(1:K)}) dx_{1:T}^{(1:K)} \\
 &= \int \prod_{k=1}^K p(x_{1:T}^{(k)}|y_{1:T}) M_{x_{1:T}}^{(-k)}(x_{1:T}^{(k)'}|x_{1:T}^{(k)}) dx_{1:T}^{(1:K)} \\
 &= \int \left[ \int p(x_{1:T}^{(1)}|y_{1:T}) M_{x_{1:T}}^{(-1)}(x_{1:T}^{(1)'}|x_{1:T}^{(1)}) dx_{1:T}^{(1)} \right] \\
 & \times \prod_{k=2}^K p(x_{1:T}^{(k)}|y_{1:T}) M_{x_{1:T}}^{(-k)}(x_{1:T}^{(k)'}|x_{1:T}^{(k)}) dx_{1:T}^{(2:K)} \\
 &= p(x_{1:T}^{(1)'}|y_{1:T}) \int \left[ \int p(x_{1:T}^{(2)}|y_{1:T}) M_{x_{1:T}}^{(-2)}(x_{1:T}^{(2)'}|x_{1:T}^{(2)}) dx_{1:T}^{(2)} \right] \\
 & \times \prod_{k=3}^K p(x_{1:T}^{(k)}|y_{1:T}) M_{x_{1:T}}^{(-k)}(x_{1:T}^{(k)'}|x_{1:T}^{(k)}) dx_{1:T}^{(3:K)} \\
 &= p(x_{1:T}^{(1)'}|y_{1:T}) p(x_{1:T}^{(2)'}|y_{1:T}) \\
 & \times \int \prod_{k=3}^K p(x_{1:T}^{(k)}|y_{1:T}) M_{x_{1:T}}^{(-k)}(x_{1:T}^{(k)'}|x_{1:T}^{(k)}) dx_{1:T}^{(3:K)} \\
 &= \prod_{k=1}^K p(x_{1:T}^{(k)'}|y_{1:T}) \quad (\text{by induction}) \\
 &= \bar{\pi}(x_{1:T}^{(1:K)'}) .
 \end{aligned}$$

---

<sup>1</sup>School of Mathematics, University of Edinburgh, Edinburgh, UK <sup>2</sup>The Alan Turing Institute, London, UK <sup>3</sup>Department of Statistics, University of Oxford, Oxford, UK. Correspondence to: Alexander Y. Shestopaloff <ashestopaloff@turing.ac.uk>.
